# Supplementary material for: t-Darpp overexpression in HER2-positive breast cancer confers a survival advantage in lapatinib
Source: PubMed Central journal article supplement (PMC4741754; doi:10.18632/oncotarget.5311), 2015-09-28
Supplement: oncotarget-06-33134-s001.pdf [file oncotarget-06-33134-s001.pdf]

## SUPPLEMENTARY FIGURES

A

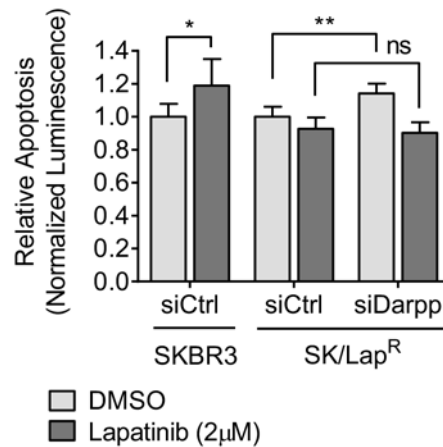

B

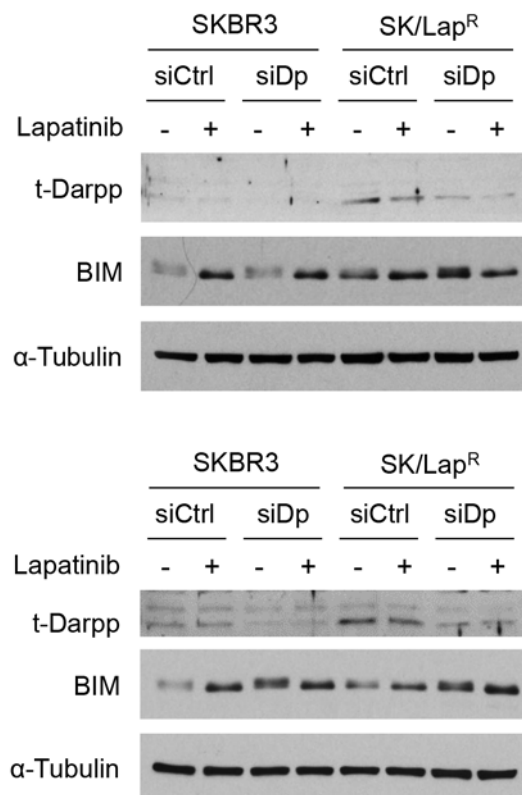

**Supplementary Figure S1: t-Darpp down-regulation in lapatinib-resistant cells.** SKBR3 and SK/Lap<sup>R</sup> 2.0 I.P cells were transiently transfected with siRNA targeted to GFP (siCtrl) or Darpp-32/t-Darpp (siDp). **A.** The relative levels of apoptosis were determined by Caspase-Glo 3/7 assay after 48 hour exposure to 0.1% DMSO or 2 µM lapatinib. Data was normalized to the mean luminescence of siCtrl, DMSO-treated cells. Bars represent mean ± standard deviation from two separate experiments, six total replicates. \* $p \leq 0.05$ , \*\* $p \leq 0.01$ . **B.** Western analysis of t-Darpp and BIM protein levels after 24 hour exposure to 0.1% DMSO (-) or 2 µM lapatinib (+). Data are from two separate experiments run in parallel with the apoptosis assays. α-Tubulin was used as a loading control.

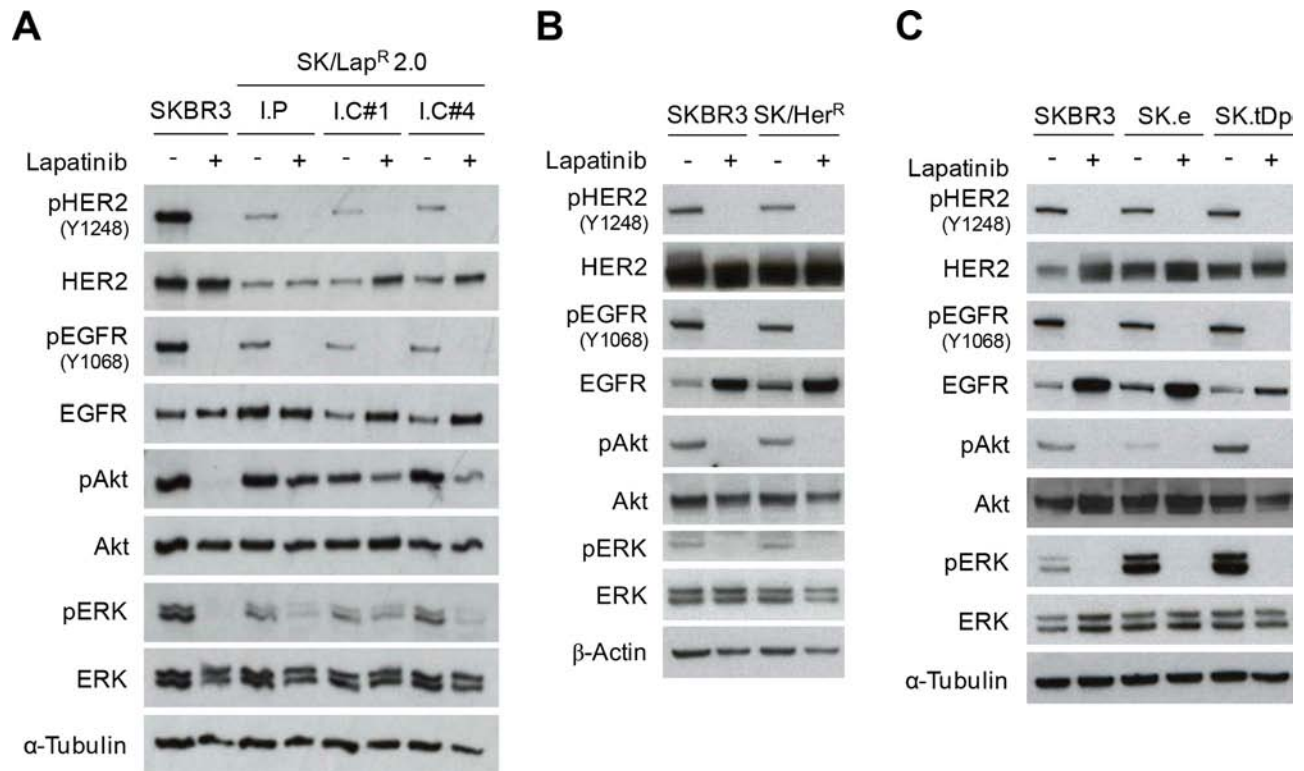

**Supplementary Figure S2: Cell signaling in response to lapatinib.** Western analysis of phosphorylated and total protein levels in cells exposed to 0.1% DMSO (-) or 2  $\mu$ M lapatinib (+) for 24 hours.  $\alpha$ -Tubulin and  $\beta$ -Actin were used as loading controls. **A.** Protein expression in lapatinib-resistant SK/Lap<sup>R</sup> cell lines. **B.** Protein expression in trastuzumab-resistant SK/Her<sup>R</sup> cells that overexpress endogenous t-Darpp. **C.** Protein expression in stably transfected SK.tDp cells that overexpress exogenous t-Darpp.

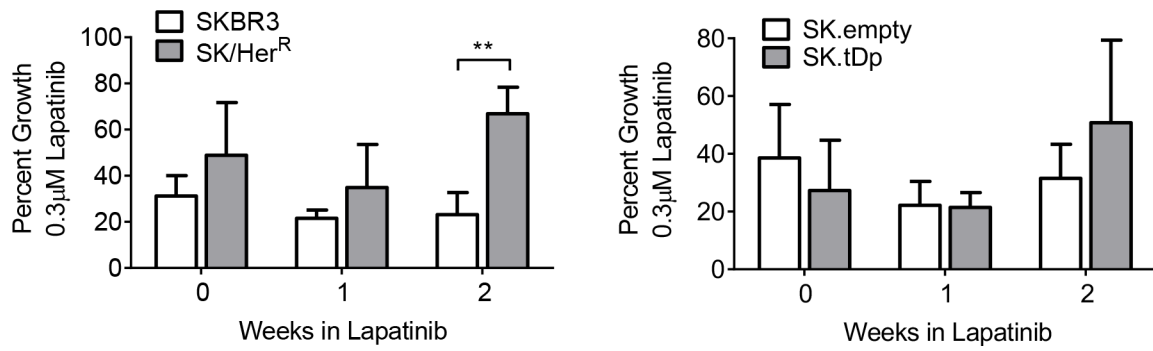

**Supplementary Figure S3: Changes in lapatinib sensitivity in cells overexpressing t-Darpp.** SK/Her<sup>R</sup> and SK.tDp cells were exposed continuously to 0.3 μM lapatinib for 2 weeks. Each week cell sensitivity to lapatinib was retested by SRB assay. Data was normalized to the mean absorbance of DMSO-treated cells; mean ± standard deviation, \*\* $p \leq 0.01$ .

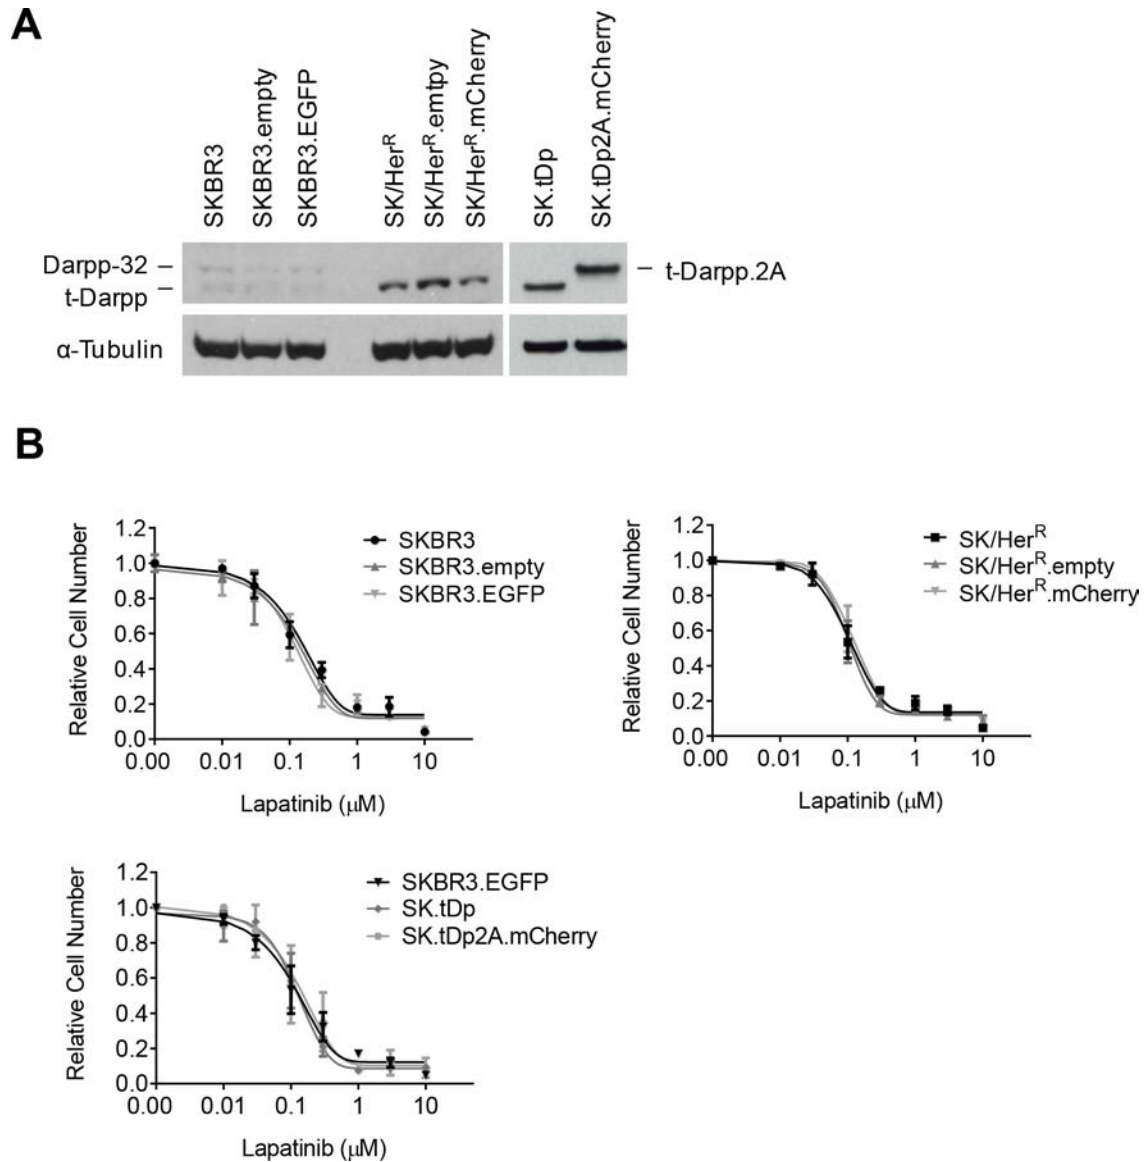

**Supplementary Figure S4: Characterization of stably transfected fluorescent cell lines.** A. Darpp-32 and t-Darpp protein levels were measured by Western analysis.  $\alpha$ -Tubulin was used as a loading control. B. Proliferation in lapatinib was quantified by SRB assay after 5-day exposure to 0.1% DMSO or increasing concentrations of lapatinib. Data was normalized to the mean absorbance of DMSO-treated cells; mean  $\pm$  standard deviation.

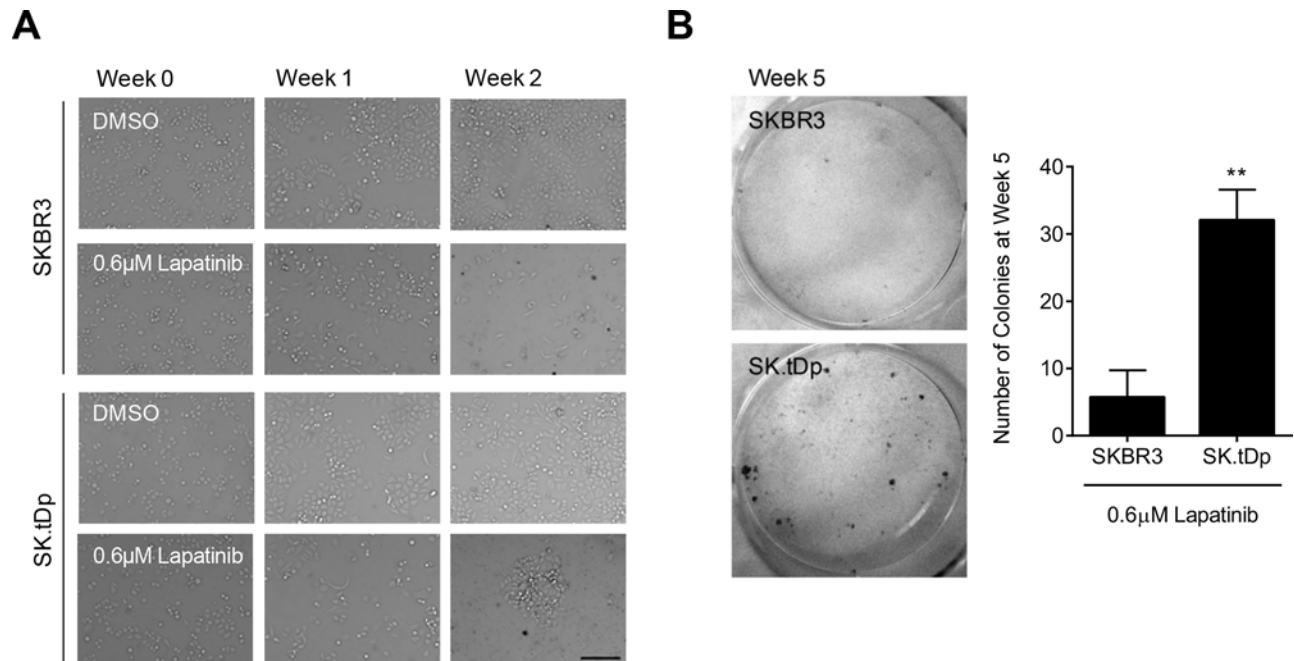

**Supplementary Figure S5: Colony formation by non-fluorescent SK.tDp cells exposed to lapatinib.** SKBR3 or SK.tDp cells were continuously exposed to 0.1% DMSO or 0.6 μM lapatinib for 5 weeks. DMSO-treated cells were split twice-weekly (1:4 dilution). Lapatinib-treated cells were grown without passaging. Each experiment was run in triplicate. **A.** Cells were imaged weekly for 2 weeks (10x magnification, scale bar = 200 μm). Shown are representative fields for each condition and time point. **B.** After 5 weeks of lapatinib exposure cells were fixed and stained with methylene blue. A representative well is shown for each cell line exposed to lapatinib. The number of colonies in triplicate wells was counted; mean ± standard deviation, \*\* $p \leq 0.01$ .
